# Supplementary material for: Long-term exposure to ambient fine particulate matter originating from traffic and residential wood combustion and the prevalence of depression
Source: PubMed Central journal article supplement — J Epidemiol Community Health. 2021 May 13;75(11):1111–6. doi: 10.1136/jech-2021-216772 (PMC8515112; doi:10.1136/jech-2021-216772), 2021-05-13
Supplement: jech-2021-216772supp001.pdf [file jech-2021-216772supp001.pdf]

## Long-term exposure to ambient fine particulate matter originating from traffic and residential wood combustion and the prevalence of depression

### Supplementary material

Allaouat Sara<sup>a</sup>, Yli-Tuomi Tarja<sup>b</sup>, Tiittanen Pekka<sup>b</sup>, Turunen Anu W<sup>b</sup>, Siponen Taina<sup>b</sup>, Kukkonen Jaakko<sup>c</sup>, Kangas Leena<sup>c</sup>, Kauhaniemi Mari<sup>c</sup>, Aarnio Mia<sup>c</sup>, Ngandu Tiia<sup>d</sup>, Lanki Timo<sup>a,b,e</sup>

<sup>a</sup>Institute of Public Health and Clinical Nutrition, University of Eastern Finland, Kuopio, Finland;

<sup>b</sup>Department of Health Security, Finnish Institute for Health and Welfare, Kuopio, Finland; <sup>c</sup>Finnish Meteorological Institute, Helsinki, Finland; <sup>d</sup>Department of Public Health and Welfare, Finnish Institute for Health and Welfare, Helsinki, Finland; <sup>e</sup>Department of Environmental and Biological Sciences, University of Eastern Finland, Kuopio, Finland

## Supplementary materials and methods

### Estimation of exposures to traffic noise, and green and blue space

We used façade noise levels as estimates of exposure to traffic noise. The road traffic noise exposure model considered the direction of windows in residential dwellings. A consulting company, Sito, calculated façade noise levels emitted by road traffic, in accordance with the EU Environmental Noise Directive 2002/49/EC<sup>1</sup>. The company used input data for the year 2016. The Common Noise Assessment Methods in Europe (CNOSSOS-EU) method was used for major highways, main streets and collector streets within areas.<sup>2</sup> All façade noise calculation points within 20 m of residential address coordinates with  $L_{den}$  (Day-evening-night equivalent level) equal to or higher than 30 dB were selected for each home. Where all windows of the dwelling faced the street, the highest  $L_{den}$  was attributed as noise exposure to the building. Where all windows faced the yard, the lowest  $L_{den}$  was used. Where the windows faced both the street and the yard, an average of the highest and lowest noise levels was used.

The Urban Atlas 2012 was used to determine the percent coverages of green and blue spaces within buffer zones of 300 m and 1 km around each home.<sup>3</sup> The ArcMap 10.5 was used to calculate the surface areas of green and blue spaces within the buffers. Arable lands, pastures, forests, green urban areas, herbaceous vegetation associations, and open spaces with little or no vegetation were classified as green spaces, while sea, lakes, rivers, and wetlands were classified as blue spaces. In the main analyses, we used *accessible* green space as a confounder, i.e. green space excluding arable lands and pastures.

### References

- (1) European Parliament/Council of the European Union. Directive 2002/49/EC of the European Parliament and of the Council of 25 June 2002 relating to the Assessment and Management of Environmental Noise – Declaration by the Commission in the Conciliation Committee on the Directive relating to the Assessment and Management of Environmental Noise. *Official Journal of the European Communities L* 2002;189:12–26.
- (2) Kephelopoulos S, Paviotti M, Anfosso-Lédée F. Common noise assessment methods in Europe (CNOSSOS-EU). Luxembourg: Publications Office of the European Union, 2012.
- (3) European Union, Copernicus Land Monitoring Service 2012, European Environment Agency (EEA). The Urban Atlas 2012. <https://land.copernicus.eu/local/urban-atlas/urban-atlas-2012/> (20 December 2017, date last accessed).

## Supplementary tables and figures

**Supplementary table S1.** Covariate categories.

| Covariate                         | Categories                                                                                                                                                                                                                                                                                                        |
|-----------------------------------|-------------------------------------------------------------------------------------------------------------------------------------------------------------------------------------------------------------------------------------------------------------------------------------------------------------------|
| Age                               | < 55 years old / 55-69 years old / > 69 years old                                                                                                                                                                                                                                                                 |
| Sex                               | female / male                                                                                                                                                                                                                                                                                                     |
| Marital status                    | single / married or cohabiting / divorced or widow                                                                                                                                                                                                                                                                |
| Employment status                 | full-time job / part-time job / retired / unemployed / other                                                                                                                                                                                                                                                      |
| Annual household income           | ≤ 30 000 € / > 30 000 – 50 000 € / > 50 000 – 90 000 € / > 90 000 €                                                                                                                                                                                                                                               |
| Education                         | comprehensive school / vocational or high school / college level or polytechnic training / academic training                                                                                                                                                                                                      |
| Alcohol intake in the last 7 days | none / moderate / high                                                                                                                                                                                                                                                                                            |
| Daily smoking                     | none / ≤ 2 units / > 2 units                                                                                                                                                                                                                                                                                      |
| Weekly physical exercise          | < once / 1-2 times / ≥ 3 times                                                                                                                                                                                                                                                                                    |
| Use of summer cottage in summer   | 0-13 days / 14 days – 2 months / > 2 months                                                                                                                                                                                                                                                                       |
| Own wood combustion               | never or < once a month / 1-3 times a month / 1-2 times a week / ≥ 3 times a week                                                                                                                                                                                                                                 |
| Comorbidities                     | none / 1 comorbidity / 2 comorbidities / > 2 comorbidities<br><br>Note: The covariate included hypertension, heart failure, angina pectoris, diabetes, cancer, bronchial asthma, pulmonary emphysema or chronic bronchitis, mental disease other than depression, rheumatoid arthritis, and other chronic disease |
| Road traffic noise annoyance      | no / little / some to extremely high<br><br>Note: The covariate was defined by the survey question “are you usually disturbed by [road traffic noise] when you are at home indoors and the windows are closed?”.                                                                                                  |

**Supplementary figure S1.**

Road traffic noise

|        |                         |                        |                         |                                               |                                |                   |                         |
|--------|-------------------------|------------------------|-------------------------|-----------------------------------------------|--------------------------------|-------------------|-------------------------|
| - 0.09 | Green space within 300m |                        |                         |                                               |                                |                   |                         |
| - 0.09 | 0.52                    | Green space within 1km |                         |                                               |                                |                   |                         |
| - 0.20 | 0.39                    | 0.69                   | Nature space within 1km |                                               |                                |                   |                         |
| 0.08   | 0.04                    | 0.17                   | - 0.19                  | Residential wood combustion PM <sub>2.5</sub> |                                |                   |                         |
| 0.47   | - 0.19                  | - 0.24                 | - 0.34                  | - 0.23                                        | Road traffic PM <sub>2.5</sub> |                   |                         |
| - 0.02 | - 0.03                  | - 0.06                 | 0.18                    | - 0.03                                        | - 0.10                         | Area-level income |                         |
| - 0.05 | 0                       | - 0.06                 | - 0.19                  | - 0.09                                        | - 0.01                         | - 0.83            | Area-level unemployment |

Spearman correlation matrix for various physical and social environmental exposures. PM<sub>2.5</sub>, particulate matter with an aerodynamic diameter  $\leq 2.5 \mu\text{m}$ .

**Supplementary figure S2.**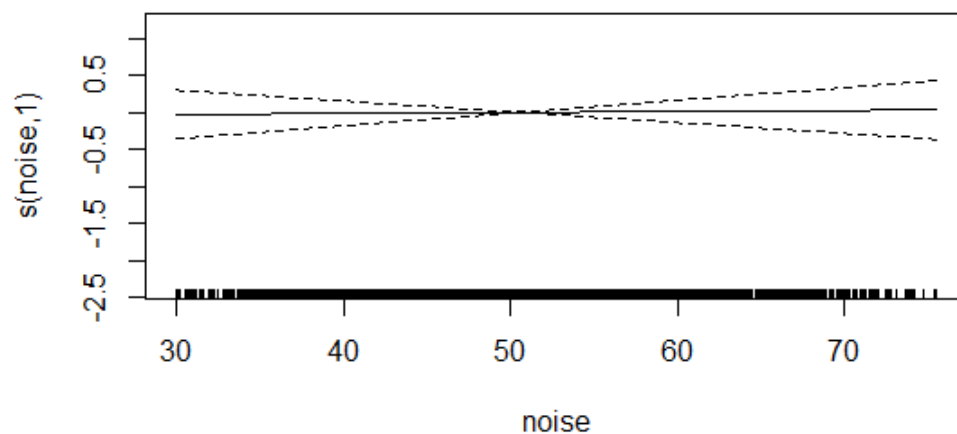

Shape of the association between the confounder road traffic noise (noise) and depression in the main model.  $s(\cdot)$ , spline function. The continuous line is the graphical representation of the smooth function for road traffic noise and the dashed line its 95% confidence interval.

**Supplementary figure S3.**

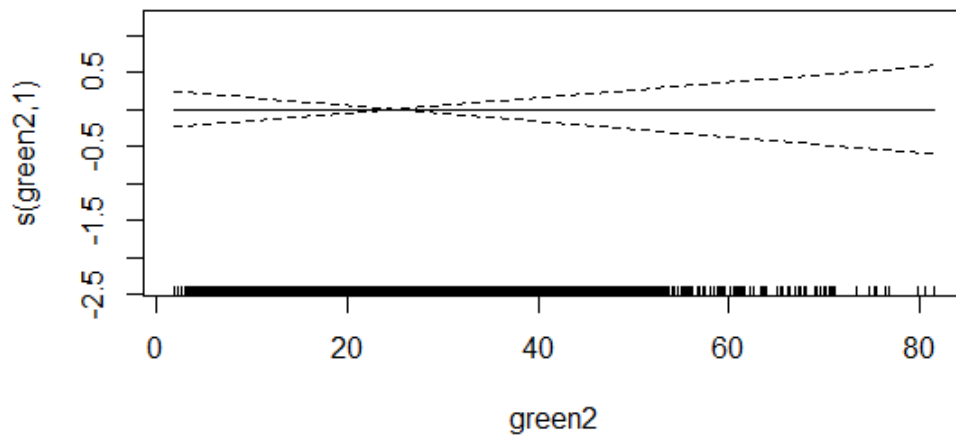

Shape of the association between the confounder green spaces within 1 km (green2) and depression in the main model.  $s()$ , spline function. The continuous line is the graphical representation of the smooth function for green spaces within 1 km and the dashed line its 95% confidence interval.

**Supplementary figure S4.**

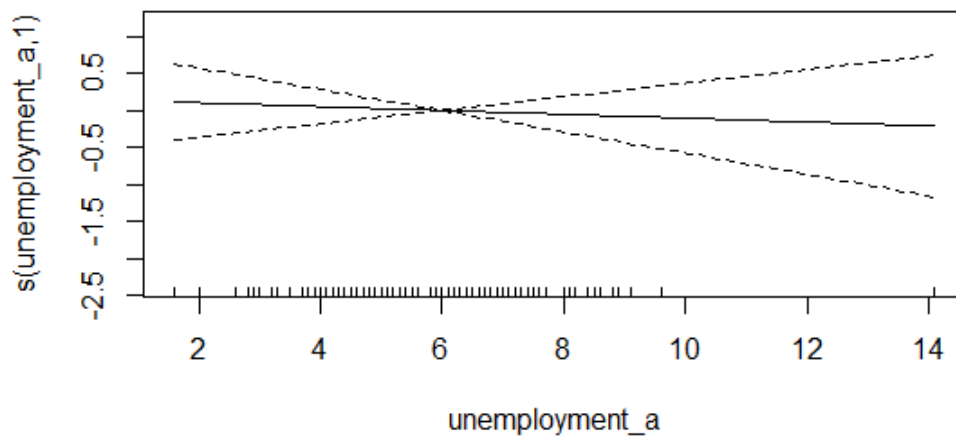

Shape of the association between the confounder area-level unemployment (unemployment\_a) and depression in the main model.  $s()$ , spline function. The continuous line is the graphical representation of the smooth function for area-level unemployment and the dashed line its 95% confidence interval.

**Supplementary figure S5.**

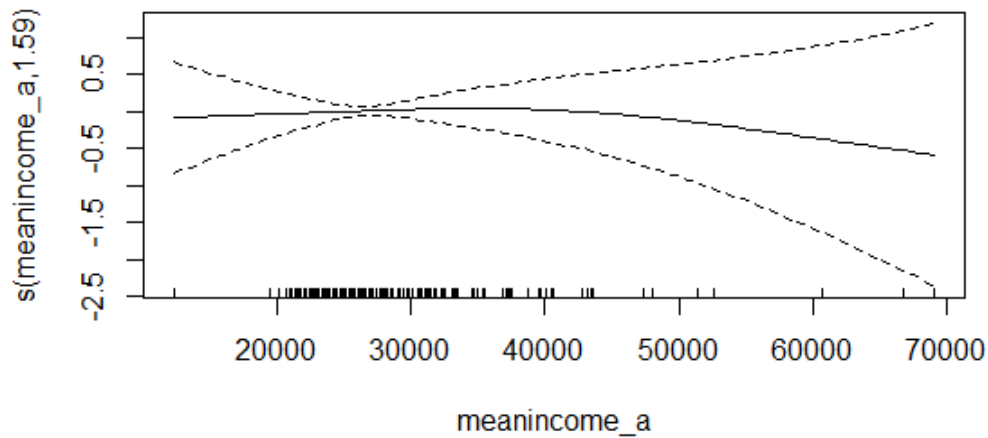

Shape of the association between the confounder area-level mean income (meanincome\_a) and depression in the main model.  $s()$ , spline function. The continuous line is the graphical representation of the smooth function for area-level mean income and the dashed line its 95% confidence interval.

**Supplementary figure S6.**

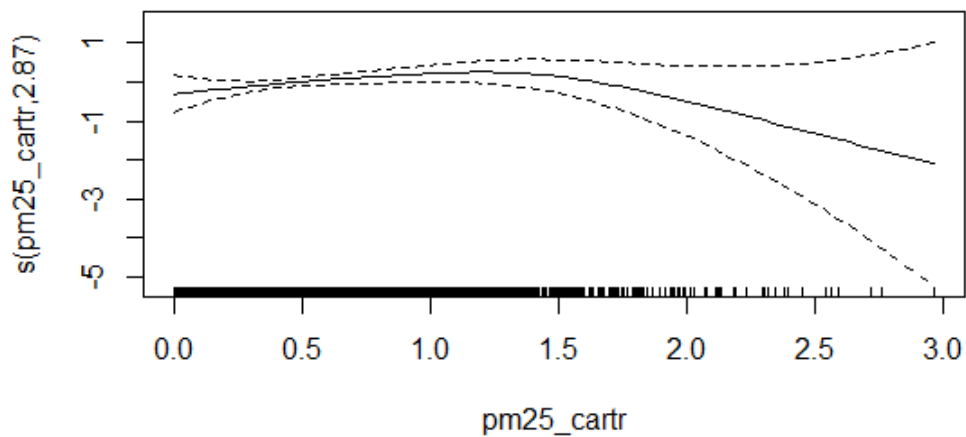

Shape of the association between road traffic PM<sub>2.5</sub> (pm25\_cattr) and depression in the main model.  $s()$ , spline function. The continuous line is the graphical representation of the smooth function for road traffic PM<sub>2.5</sub> and the dashed line its 95% confidence interval.

**Supplementary figure S7.**

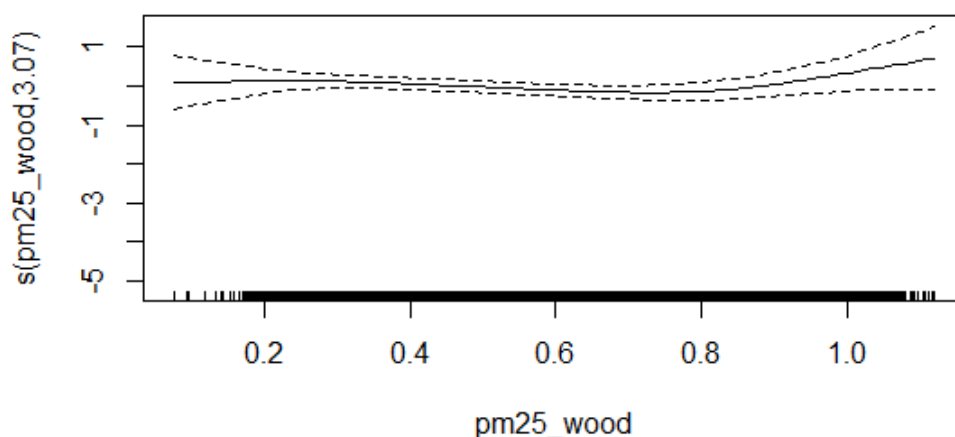

Shape of the association between residential wood smoke  $PM_{2.5}$  ( $pm25\_wood$ ) and depression in the main model.  $s()$ , spline function. The continuous line is the graphical representation of the smooth function for residential wood smoke  $PM_{2.5}$  and the dashed line its 95% confidence interval.

**Supplementary table S2.** Sensitivity analyses for the associations of long-term exposure to  $PM_{2.5}$  from residential wood combustion and road traffic with the prevalence of depression

| Model                                                                                                                                | <i>n</i><br>(total) | <i>n</i><br>outcome<br>event | Exposure                          | OR (95% CI)                          |
|--------------------------------------------------------------------------------------------------------------------------------------|---------------------|------------------------------|-----------------------------------|--------------------------------------|
| Basic model <sup>d</sup>                                                                                                             | 5895                | 377                          | Residential wood smoke $PM_{2.5}$ | 0.81 (0.46, 1.44)<br><i>P</i> = 0.49 |
|                                                                                                                                      |                     |                              | Road traffic $PM_{2.5}$           | 1.24 (0.88, 1.75)<br><i>P</i> = 0.21 |
| Main model <sup>b</sup><br>adjusted for green<br>space within 300 m<br>but not for green<br>space within 1 km                        | 5895                | 377                          | Residential wood smoke $PM_{2.5}$ | 0.78 (0.43, 1.41)<br><i>P</i> = 0.41 |
|                                                                                                                                      |                     |                              | Road traffic $PM_{2.5}$           | 1.22 (0.86, 1.72)<br><i>P</i> = 0.26 |
| Main model<br>adjusted for nature<br>space within 1 km<br>(and not green<br>space) and use of<br>summer cottage<br>during summertime | 5848                | 370                          | Residential wood smoke $PM_{2.5}$ | 0.85 (0.43, 1.67)<br><i>P</i> = 0.63 |
|                                                                                                                                      |                     |                              | Road traffic $PM_{2.5}$           | 1.27 (0.87, 1.83)<br><i>P</i> = 0.21 |
| Main model<br>adjusted for BMI                                                                                                       | 5804                | 369                          | Residential wood smoke $PM_{2.5}$ | 0.70 (0.38, 1.28)<br><i>P</i> = 0.25 |
|                                                                                                                                      |                     |                              | Road traffic $PM_{2.5}$           | 1.24 (0.87, 1.75)                    |

|                                                                                                         |      |     |                                          |                   |
|---------------------------------------------------------------------------------------------------------|------|-----|------------------------------------------|-------------------|
|                                                                                                         |      |     |                                          | $P = 0.23$        |
| Main model adjusted for own wood combustion                                                             | 5723 | 363 | Residential wood smoke PM <sub>2.5</sub> | 0.88 (0.48, 1.63) |
|                                                                                                         |      |     |                                          | $P = 0.69$        |
|                                                                                                         |      |     | Road traffic PM <sub>2.5</sub>           | 1.17 (0.81, 1.68) |
|                                                                                                         |      |     |                                          | $P = 0.40$        |
| Single pollutant model <sup>c</sup> for road traffic PM <sub>2.5</sub> adjusted for own wood combustion | 5723 | 363 | Road traffic PM <sub>2.5</sub>           | 1.20 (0.85, 1.68) |
|                                                                                                         |      |     |                                          | $P = 0.29$        |
| Main model adjusted for road traffic annoyance but not for road traffic noise                           | 5895 | 377 | Residential wood smoke PM <sub>2.5</sub> | 0.74 (0.41, 1.32) |
|                                                                                                         |      |     |                                          | $P = 0.31$        |
|                                                                                                         |      |     | Road traffic PM <sub>2.5</sub>           | 1.14 (0.84, 1.55) |
|                                                                                                         |      |     |                                          | $P = 0.39$        |
| Main model adjusted for comorbidities                                                                   | 5774 | 354 | Residential wood smoke PM <sub>2.5</sub> | 0.78 (0.42, 1.45) |
|                                                                                                         |      |     |                                          | $P = 0.44$        |
|                                                                                                         |      |     | Road traffic PM <sub>2.5</sub>           | 1.19 (0.82, 1.71) |
|                                                                                                         |      |     |                                          | $P = 0.36$        |

**Supplementary table S2 (cont.).** Sensitivity analyses for the associations of long-term exposure to PM<sub>2.5</sub> from residential wood combustion and road traffic with the prevalence of depression

| Model                                                                                  | <i>n</i> (total) | <i>n</i> outcome event | Exposure                                 | OR (95% CI)       |
|----------------------------------------------------------------------------------------|------------------|------------------------|------------------------------------------|-------------------|
| Main model where smokers are excluded                                                  | 4716             | 325                    | Residential wood smoke PM <sub>2.5</sub> | 0.92 (0.48, 1.75) |
|                                                                                        |                  |                        |                                          | $P = 0.79$        |
|                                                                                        |                  |                        | Road traffic PM <sub>2.5</sub>           | 1.38 (0.94, 2.01) |
|                                                                                        |                  |                        |                                          | $P = 0.09$        |
| Main model where participants who changed address in the past year are excluded        | 5448             | 340                    | Residential wood smoke PM <sub>2.5</sub> | 0.75 (0.40, 1.41) |
|                                                                                        |                  |                        |                                          | $P = 0.37$        |
|                                                                                        |                  |                        | Road traffic PM <sub>2.5</sub>           | 1.24 (0.84, 1.80) |
|                                                                                        |                  |                        |                                          | $P = 0.27$        |
| Main model where participants who changed address in the past three years are excluded | 4236             | 244                    | Residential wood smoke PM <sub>2.5</sub> | 1.12 (0.53, 2.33) |
|                                                                                        |                  |                        |                                          | $P = 0.77$        |
|                                                                                        |                  |                        | Road traffic PM <sub>2.5</sub>           | 1.01 (0.63, 1.59) |
|                                                                                        |                  |                        |                                          | $P = 0.96$        |
| Main model where participants living in the fifth floor or higher are excluded         | 5139             | 314                    | Residential wood smoke PM <sub>2.5</sub> | 1.03 (0.54, 1.96) |
|                                                                                        |                  |                        |                                          | $P = 0.93$        |
|                                                                                        |                  |                        | Road traffic PM <sub>2.5</sub>           | 1.18 (0.77, 1.77) |
|                                                                                        |                  |                        |                                          | $P = 0.44$        |



|                                                                                                             |      |     |                                          |                   |
|-------------------------------------------------------------------------------------------------------------|------|-----|------------------------------------------|-------------------|
| Main model where participants with the highest residential wood smoke PM <sub>2.5</sub> levels are excluded | 5883 | 377 | Residential wood smoke PM <sub>2.5</sub> | 0.78 (0.43, 1.42) |
|                                                                                                             |      |     |                                          | <i>P</i> = 0.42   |
|                                                                                                             |      |     | Road traffic PM <sub>2.5</sub>           | 1.23 (0.86, 1.74) |
|                                                                                                             |      |     |                                          | <i>P</i> = 0.25   |
| Main model where participants with the highest road traffic PM <sub>2.5</sub> levels are excluded           | 5882 | 377 | Residential wood smoke PM <sub>2.5</sub> | 0.77 (0.42, 1.39) |
|                                                                                                             |      |     |                                          | <i>P</i> = 0.38   |
|                                                                                                             |      |     | Road traffic PM <sub>2.5</sub>           | 1.20 (0.84, 1.70) |
|                                                                                                             |      |     |                                          | <i>P</i> = 0.31   |
| Main model where depression medication use is the response variable                                         | 5835 | 385 | Residential wood smoke PM <sub>2.5</sub> | 0.96(0.53, 1.71)  |
|                                                                                                             |      |     |                                          | <i>P</i> = 0.88   |
|                                                                                                             |      |     | Road traffic PM <sub>2.5</sub>           | 1.11 (0.77, 1.58) |
|                                                                                                             |      |     |                                          | <i>P</i> = 0.56   |

BMI, body mass index; CI, confidence interval; OR odds ratios; PM<sub>2.5</sub>, particulate matter with an aerodynamic diameter  $\leq 2.5 \mu\text{m}$ .

<sup>d</sup>Basic model adjusted for road traffic noise, green space within 1 km, age, sex, marital status, employment status, annual household income, education, daily smoking, and weekly physical exercise.

<sup>b, c</sup>Main model and single pollutant model additionally adjusted for road traffic noise, green space within 1 km, age, sex, marital status, employment status, annual household income, education, daily smoking, weekly physical exercise, area-level unemployment, and area-level income.
